# Supplementary material for: Enabling electrochemical N2 reduction to NH3 in the low overpotential region using non-noble metal Bi electrodes via surface composition modification
Source: Royal Society of Chemistry journal article supplement (doi:10.1039/d0ta02550j), 2020-01-01
Supplement: d0ta02550j1.pdf [file d0ta02550j1.pdf]

## **Supplementary information**

# **Enabling Electrochemical N<sub>2</sub> Reduction to NH<sub>3</sub> in the Low Overpotential Region Using Non-Noble Metal Bi Electrodes via Surface Composition Modification**

Youn Jeong Jang<sup>1,2</sup> and Kyoung-Shin Choi<sup>1,\*</sup>

*<sup>1</sup>Department of Chemistry, University of Wisconsin-Madison, Madison, WI 53706, United States*

*<sup>2</sup>Department of Chemical Engineering, University of Hanyang, Seongdong-gu, Seoul, 04763,  
Republic of Korea*

\* Correspondence and requests for materials should be addressed to K.-S.C.

(email: kschoi@chem.wisc.edu).

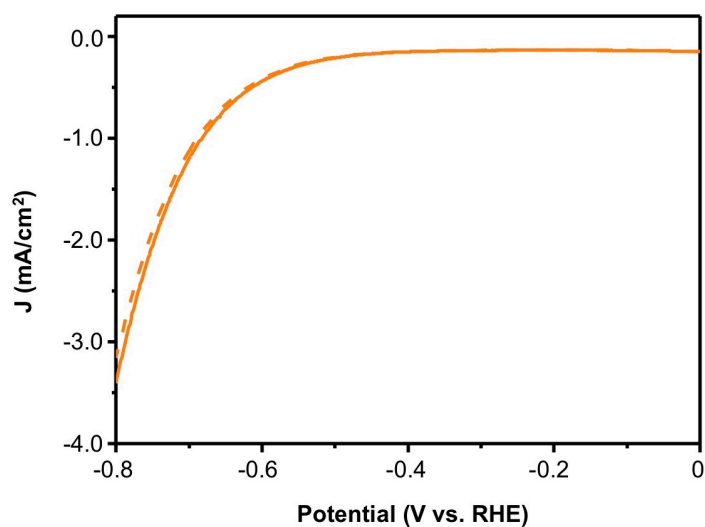

**Figure S1.** LSVs of a p-Bi electrode obtained in 0.5 M phosphate buffer (pH 7.5) saturated with N<sub>2</sub> (solid) or Ar (dashed) after applying -0.3 V vs. RHE for 1 min to remove the surface Bi<sub>2</sub>O<sub>3</sub> layer (scan rate: 10 mV/s).

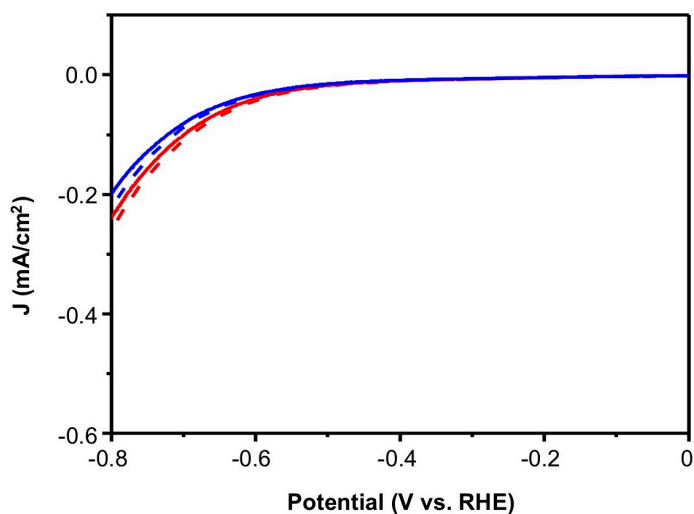

**Figure S2.** LSVs of the Ti foil used as the substrate to deposit p-Bi electrode obtained in 0.5 M phosphate buffer (pH 7.5) saturated with N<sub>2</sub> (solid) or Ar (dashed) with (blue) and without (red) 25 mM V<sub>2</sub>O<sub>5</sub> (scan rate: 10 mV/s).

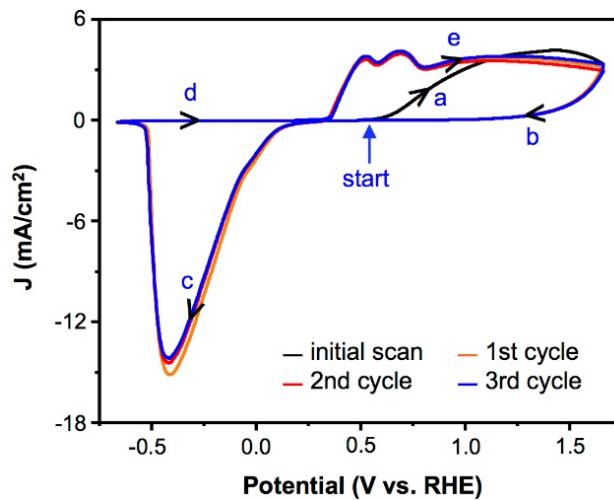

**Figures S3.** The CV treatment performed on a p-Bi electrode in 0.5 M phosphate buffer (pH 7.5) (scan rate: 25 mV/s). The potential was initially swept from the OCP to 1.62 V vs. RHE (denoted as a) and then cycled between 1.62 V vs. RHE and -0.65 V vs. RHE (b → c → d → e) three times and ended at 1.62 V vs. RHE.

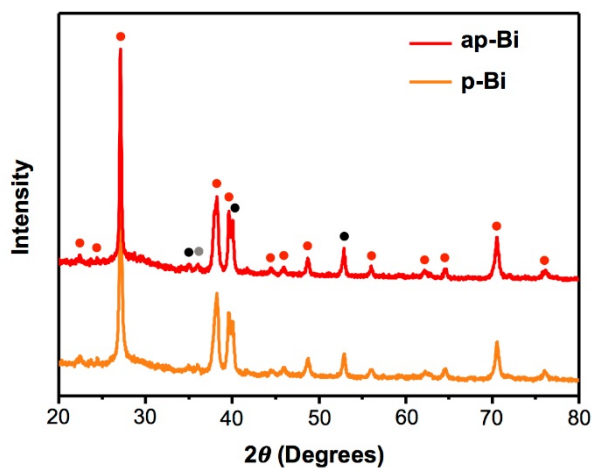

**Figure S4.** XRD patterns of p-Bi and ap-Bi electrodes. The peaks generated by Bi (JCPDS No: 85-1329) are indicated by red dots. The Ti (JCPDS No: 44-1294) and TiO<sub>2</sub> (JCPDS No. 34-0180) peaks from a Ti substrate are indicated by black and gray dots, respectively.

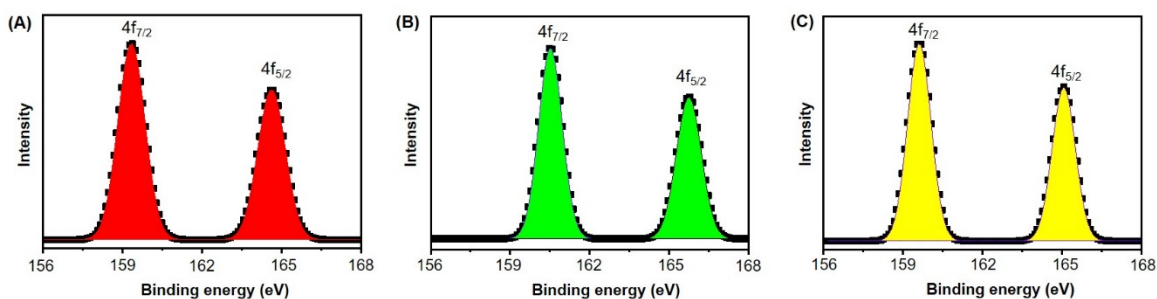

**Figure S5.** Bi 4f XPS spectra of (A)  $\text{Bi}_2\text{O}_3$  (Aldrich, 99.999 %), (B)  $\text{BiPO}_4$  (Aldrich, 99.99 %) and (C)  $\text{BiVO}_4$  (prepared using the method reported in Ref. 36 in the main text) used as references to index the Bi spectra shown in Figures 1C-D, 4C and 5C.

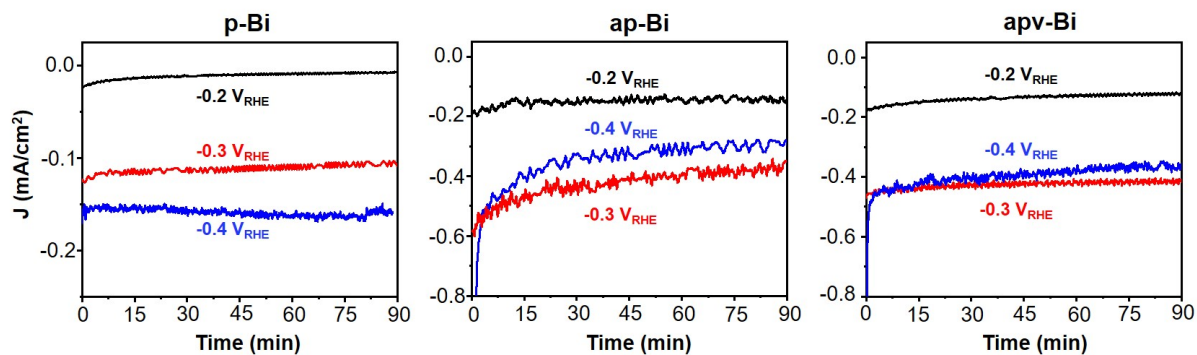

**Figure S6.** J-t profiles of p-Bi, ap-Bi, and apv-Bi electrodes during ENRR at various potentials in  $\text{N}_2$  saturated phosphate buffer (pH 7.5).

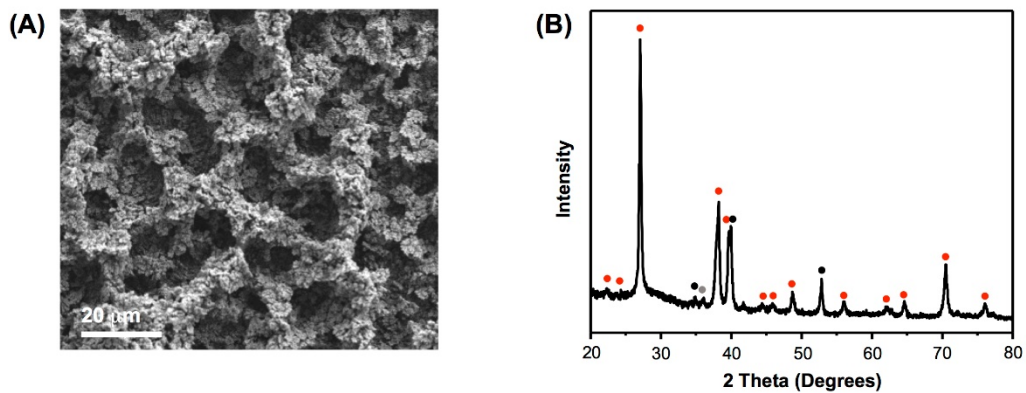

**Figure S7.** (A) SEM image and (B) XRD pattern of an apv-Bi electrode. The peaks generated by Bi (JCPDS No: 85-1329) are indicated by red dots. The Ti (JCPDS No: 44-1294) and  $\text{TiO}_2$  (JCPDS No. 34-0180) peaks from a Ti substrate are indicated by black and gray dots, respectively.

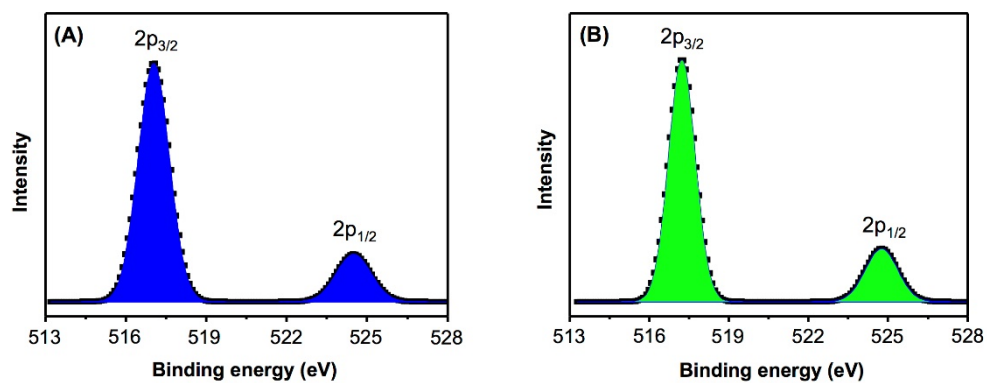

**Figure S8.** V 2p XPS spectra of (A)  $\text{BiVO}_4$  and (B)  $\text{VOPO}_4$  used as references to index V peaks shown in Figures 4E and 5D.

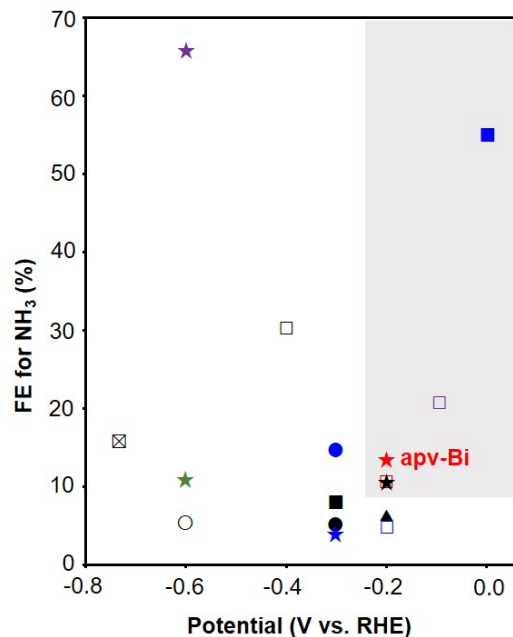

| Category        | Symbol | Catalyst                                         | F.E. % (Poten.)                   | Electrolyte (pH)                                  | Reference                             |
|-----------------|--------|--------------------------------------------------|-----------------------------------|---------------------------------------------------|---------------------------------------|
| Noble Metal     | □      | Au nanocage                                      | 30.2 % (-0.4 V <sub>RHE</sub> )   | 0.5 M NaClO <sub>4</sub>                          | Nanoenergy, 2018, 49, 316             |
|                 | ◻      | a-Au NP/RGO                                      | 10.1 % (-0.2 V <sub>RHE</sub> )   | Diluted HCl (pH 1)                                | Adv. Mater. 2017, 29, 1700001         |
|                 | ◻      | THH-Au NR                                        | 4.0 % (-0.2 V <sub>RHE</sub> )    | 0.1 M KOH (pH 13)                                 | Adv. Mater. 2017, 29, 1604799         |
|                 | ◻      | Au NP/NCM                                        | 22.0 % (-0.1 V <sub>RHE</sub> )   | 0.1 M HCl (pH 1)                                  | Angew. Chem. Int. Ed. 2018, 57, 12360 |
|                 | ○      | Ag nanosheet                                     | 4.8 % (-0.6 V <sub>RHE</sub> )    | 0.1 M HCl (pH 1)                                  | Chem. Commun. 2018, 54, 11427         |
| Non-Noble Metal | ●      | Mo <sub>2</sub> N                                | 4.5 % (-0.3 V <sub>RHE</sub> )    | 0.1 M HCl (pH 1)                                  | Chem. Commun. 2018, 54, 8474          |
|                 | ●      | Mo atom                                          | 14.6 % (-0.3 V <sub>RHE</sub> )   | 0.1 M KOH (pH 13)                                 | Angew. Chem. Int. Ed. 2019, 58, 2321  |
|                 | ■      | Fe/Fe <sub>3</sub> O <sub>4</sub>                | 8.29 % (-0.3 V <sub>RHE</sub> )   | 0.5 M KH <sub>2</sub> PO <sub>4</sub> (pH 7.5)    | ACS Catal. 2018, 8, 9312              |
|                 | ■      | Fe-N-C                                           | 56.55 % (0.0 V <sub>RHE</sub> )   | 0.1 M KOH (pH 13)                                 | Nat. Commun. 2019, 10:341             |
|                 | ▲      | VN                                               | 6.5 % (-0.2 V <sub>RHE</sub> )    | N <sub>2</sub> -H <sub>2</sub> (1 atm, 0.1 L/min) | J. Am. Chem. Soc. 2018, 140, 13387    |
|                 | ★      | a-Bi <sub>4</sub> V <sub>2</sub> O <sub>11</sub> | 10.16 % (-0.2 V <sub>RHE</sub> )  | Diluted HCl (pH 1)                                | Angew. Chem. Int. Ed. 2018, 57, 6073  |
|                 | ★      | defective Bi                                     | 11.68 % (-0.6 V <sub>RHE</sub> )  | 0.2 M Na <sub>2</sub> SO <sub>4</sub>             | Angew. Chem. Int. Ed. 2019, 58, 1     |
|                 | ★      | Bi NC                                            | 66 % (-0.6 V <sub>RHE</sub> )     | 0.5 M K <sub>2</sub> SO <sub>4</sub> (pH 3.5)     | Nat. Catal. 2019, 2, 448              |
|                 | ★      | p-Bi                                             | 3.7 % (-0.3 V <sub>RHE</sub> )    | 0.5 M KH <sub>2</sub> PO <sub>4</sub> (pH 7.5)    | This work                             |
|                 | ★      | apv-Bi                                           | 13.2 % (-0.2 V <sub>RHE</sub> )   | 0.5 M KH <sub>2</sub> PO <sub>4</sub> (pH 7.5)    | This work                             |
| Metal free      | ⊠      | B <sub>4</sub> C                                 | 15.95 % (-0.75 V <sub>RHE</sub> ) | Diluted HCl (pH 1)                                | Nat. Commun. 2018, 9:3485             |

**Figure S9.** Literature survey of the highest FEs for NH<sub>3</sub> production reported to date. A table summarizing the performances is also shown. Any study that reports NH<sub>3</sub> production at a potential where NH<sub>3</sub> production is thermodynamically not possible is not included. The shaded region shows the catalysts that achieved a FE for NH<sub>3</sub> production greater than 10% at a potential ≤ -0.2 V vs. RHE.

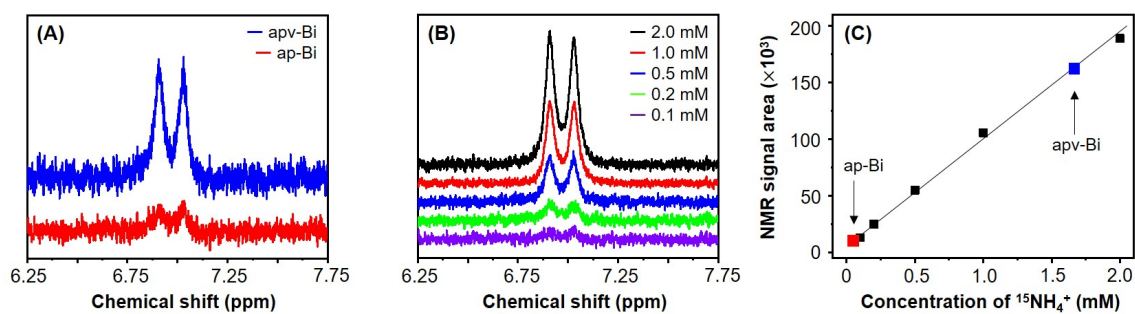

**Figure S10.** (A) <sup>1</sup>H-NMR spectra of <sup>15</sup>NH<sub>4</sub><sup>+</sup> produced by ENRR using the ap-Bi and apv-Bi electrodes at -0.2 V vs. RHE; (B) <sup>1</sup>H-NMR spectra of <sup>15</sup>NH<sub>4</sub><sup>+</sup> in standard solutions and (C) the resulting calibration curve.

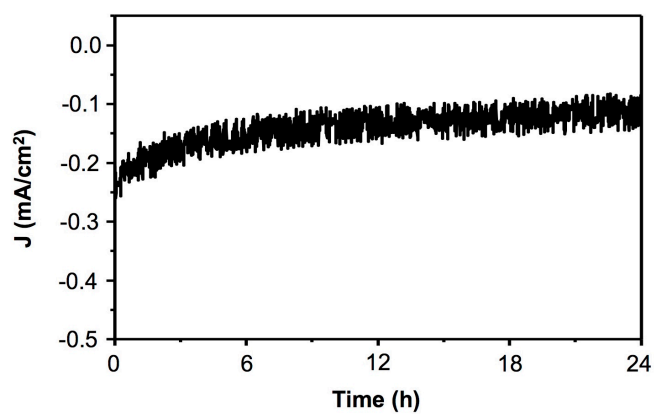

**Figure S11.** The *J*-*t* plot of the apv-Bi at -0.2 V vs RHE for 24 hours in N<sub>2</sub>-saturated phosphate buffer (pH 7.5) containing 25 mM V<sub>2</sub>O<sub>5</sub>. The FE for NH<sub>3</sub> production obtained from this experiment was 11.7%.

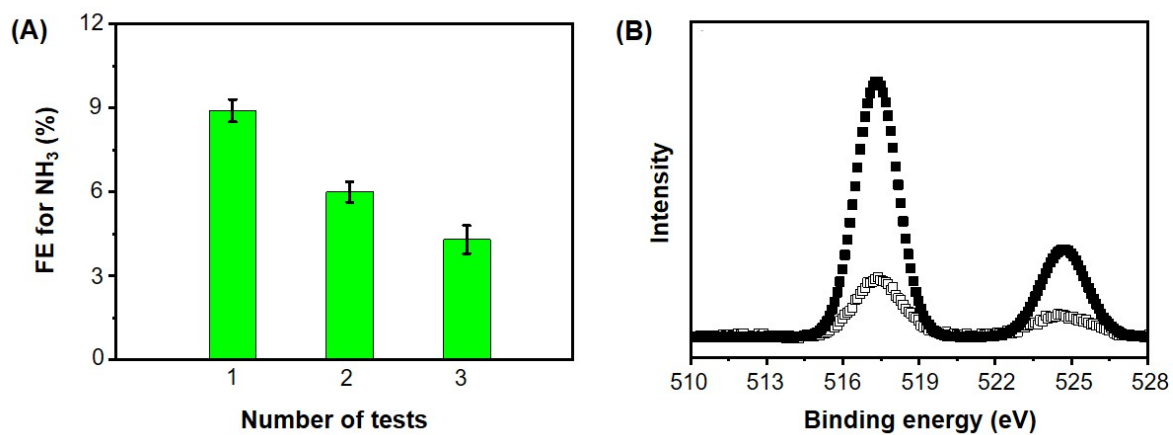

**Figure S12.** (A) Changes in FE for  $\text{NH}_3$  production of an apv-Bi electrode for repeated ENRR at  $-0.2$  V vs. RHE in  $0.5$  M phosphate buffer (pH 7.5) without  $25$  mM  $\text{V}_2\text{O}_5$ . (B) V 2p XPS spectrum of an apv-Bi electrode before (filled squares) and after (empty squares) repeating ENRR 3 times at  $-0.2$  V vs. RHE in  $0.5$  M phosphate buffer (pH 7.5) without  $25$  mM  $\text{V}_2\text{O}_5$ .



**Table S1.** Yields and production rates of NH<sub>3</sub> obtained by p-Bi, ap-Bi, and apv-Bi electrodes in N<sub>2</sub>-saturated phosphate buffer (pH 7.5).

| <b>Potential<br/>V vs RHE</b> | <b>Yield (<math>\mu\text{g}/\text{cm}^2</math>)</b> |              |               | <b>Production rate (<math>\mu\text{g}/\text{cm}^2\cdot\text{h}</math>)</b> |              |               |
|-------------------------------|-----------------------------------------------------|--------------|---------------|----------------------------------------------------------------------------|--------------|---------------|
|                               | <b>p-Bi</b>                                         | <b>ap-Bi</b> | <b>apv-Bi</b> | <b>p-Bi</b>                                                                | <b>ap-Bi</b> | <b>apv-Bi</b> |
| <b>-0.2</b>                   | 0.00                                                | 0.65         | 7.53          | 0.00                                                                       | 0.43         | 5.02          |
| <b>-0.3</b>                   | 1.41                                                | 7.28         | 12.80         | 0.94                                                                       | 4.85         | 8.53          |
| <b>-0.4</b>                   | 1.12                                                | 5.12         | 8.67          | 0.75                                                                       | 3.41         | 5.78          |
